# Supplementary material for: Association of the IGF1 5′UTR Polymorphism in Meat-Type Sheep Breeds Considering Growth, Body Size, Slaughter, and Meat Quality Traits in Turkey
Source: MDPI journal article supplement (doi:10.3390/vetsci10040270), 2023-04-02
Supplement: s1 [file s1]

# Association of the *IGF1* 5'UTR Polymorphism in Meat-Type Sheep Breeds considering Growth, Body Size, Slaughter, and Meat Quality Traits in Turkey

Vasfiye Kader Esen <sup>1,\*</sup> and Selim Esen <sup>2,\*</sup>

<sup>1</sup> Department of Breeding and Genetics, Sheep Breeding Research Institute, Balıkesir 10200, Turkey

<sup>2</sup> Balıkesir Directorate of Provincial Agriculture and Forestry, Republic of Turkey Ministry of Agriculture and Forestry, Balıkesir 10470, Turkey

\* Correspondence: vasfiye.esen@gmail.com (V.K.E.); selim\_esen01@hotmail.com (S.E.)

**Table S1.** Sample size for multigroup comparisons for optimum animal research<sup>1</sup>.

| Model | Power | Breed | Gender | Type of Birth | Age of Dam | Variants | Total Animals |        |       | Animals per Group |        |       |
|-------|-------|-------|--------|---------------|------------|----------|---------------|--------|-------|-------------------|--------|-------|
|       |       |       |        |               |            |          | Small         | Medium | Large | Small             | Medium | Large |
| 1     | 0.80  | +     | +      | +             | +          | +        | 7560          | 1440   | NA    | 21                | 4      | NA    |
|       | 0.90  | +     | +      | +             | +          | +        | 9000          | 1800   | 1080  | 25                | 5      | 3     |
| 2     | 0.80  | +     |        | +             | +          | +        | 5400          | 1080   | 540   | 30                | 6      | 3     |
|       | 0.90  | +     |        | +             | +          | +        | 6480          | 1260   | 540   | 36                | 7      | 3     |

<sup>1</sup> Cohen's *f* values of 0.10, 0.25, and 0.40 were selected to represent small, medium, and high effect sizes, respectively. Breed: Kivırcık, Karacabey Merino, Ramlıç, German Black-Head Mutton × Kivırcık, Hampshire Down × Merino; Gender: male, female; Type of Birth: single, twin; Age of Dam: 2, 3, 4, 5, 6, 7+; Variants: *P1*, *P2*, *P3*; NA: not adjusted; +: participated in the model. Statistical power analyses were done using the "pwr" package in the R program, as suggested by Cohen [1].

**Table S2.** Genotype and variant frequencies of *IGF1* 5'UTR.

| # | Position <sup>1</sup> | Breed | n  | Genotype Frequency |      | Variant Frequency |      |
|---|-----------------------|-------|----|--------------------|------|-------------------|------|
|   |                       |       |    | CC                 | CT   | C                 | T    |
| 1 | c.28                  | K     | 44 | 0.64               | 0.36 | 0.82              | 0.18 |
|   |                       | KM    | 44 | 0.91               | 0.09 | 0.95              | 0.05 |
|   |                       | GBK   | 46 | 0.72               | 0.28 | 0.86              | 0.14 |
|   |                       | HM    | 23 | 0.70               | 0.30 | 0.85              | 0.15 |
|   |                       | R     | 24 | 1.00               | 0.00 | 1.00              | 0.00 |
|   |                       |       |    | GG                 | GC   | G                 | C    |
| 2 | c.32                  | K     | 44 | 0.64               | 0.36 | 0.82              | 0.18 |
|   |                       | KM    | 44 | 0.91               | 0.09 | 0.95              | 0.05 |
|   |                       | GBK   | 46 | 0.72               | 0.28 | 0.86              | 0.14 |
|   |                       | HM    | 23 | 0.70               | 0.30 | 0.85              | 0.15 |
|   |                       | R     | 24 | 1.00               | 0.00 | 1.00              | 0.00 |
|   |                       |       |    | GG                 | AG   | G                 | A    |
| 3 | c.34                  | K     | 44 | 0.64               | 0.36 | 0.82              | 0.18 |
|   |                       | KM    | 44 | 0.91               | 0.09 | 0.95              | 0.05 |
|   |                       | GBK   | 46 | 0.72               | 0.28 | 0.86              | 0.14 |
|   |                       | HM    | 23 | 0.70               | 0.30 | 0.85              | 0.15 |
|   |                       | R     | 24 | 1.00               | 0.00 | 1.00              | 0.00 |
|   |                       |       |    | TT                 | TC   | T                 | C    |
| 4 | c.167                 | K     | 44 | 1.00               | 0.00 | 1.00              | 0.00 |
|   |                       | KM    | 44 | 0.84               | 0.16 | 0.92              | 0.08 |
|   |                       | GBK   | 46 | 0.76               | 0.24 | 0.88              | 0.12 |
|   |                       | HM    | 23 | 1.00               | 0.00 | 1.00              | 0.00 |
|   |                       | R     | 24 | 0.79               | 0.21 | 0.90              | 0.10 |
|   |                       |       |    | GG                 | AG   | G                 | A    |
| 5 | c.172                 | K     | 44 | 1.00               | 0.00 | 1.00              | 0.00 |
|   |                       | KM    | 44 | 0.84               | 0.16 | 0.92              | 0.08 |
|   |                       | GBK   | 46 | 0.76               | 0.24 | 0.88              | 0.12 |
|   |                       | HM    | 23 | 1.00               | 0.00 | 1.00              | 0.00 |
|   |                       | R     | 24 | 0.79               | 0.21 | 0.90              | 0.10 |
|   |                       |       |    | GG                 | GC   | G                 | C    |
| 6 | c.175                 | K     | 44 | 1.00               | 0.00 | 1.00              | 0.00 |
|   |                       | KM    | 44 | 0.84               | 0.16 | 0.92              | 0.08 |
|   |                       | GBK   | 46 | 0.76               | 0.24 | 0.88              | 0.12 |
|   |                       | HM    | 23 | 1.00               | 0.00 | 1.00              | 0.00 |
|   |                       | R     | 24 | 0.79               | 0.21 | 0.90              | 0.10 |
|   |                       |       |    | GG                 | GC   | G                 | C    |
| 7 | c.186                 | K     | 44 | 1.00               | 0.00 | 1.00              | 0.00 |
|   |                       | KM    | 44 | 0.84               | 0.16 | 0.92              | 0.08 |
|   |                       | GBK   | 46 | 0.76               | 0.24 | 0.88              | 0.12 |
|   |                       | HM    | 23 | 1.00               | 0.00 | 1.00              | 0.00 |
|   |                       | R     | 24 | 0.79               | 0.21 | 0.90              | 0.10 |
|   |                       |       |    | TT                 | -    | T                 | -    |
| 8 | c.202                 | K     | 44 | 0.36               | -    | 0.36              | -    |
|   |                       | KM    | 44 | 0.25               | -    | 0.25              | -    |
|   |                       | GBK   | 46 | 0.52               | -    | 0.52              | -    |
|   |                       | HM    | 23 | 0.30               | -    | 0.30              | -    |
|   |                       | R     | 24 | 0.21               | -    | 0.21              | -    |

K: Kivırcık, KM: Karacabey Merino, R: Ramlıç, GBK: German Black-Head Mutton × Kivırcık, HM: Hampshire Down × Merino.

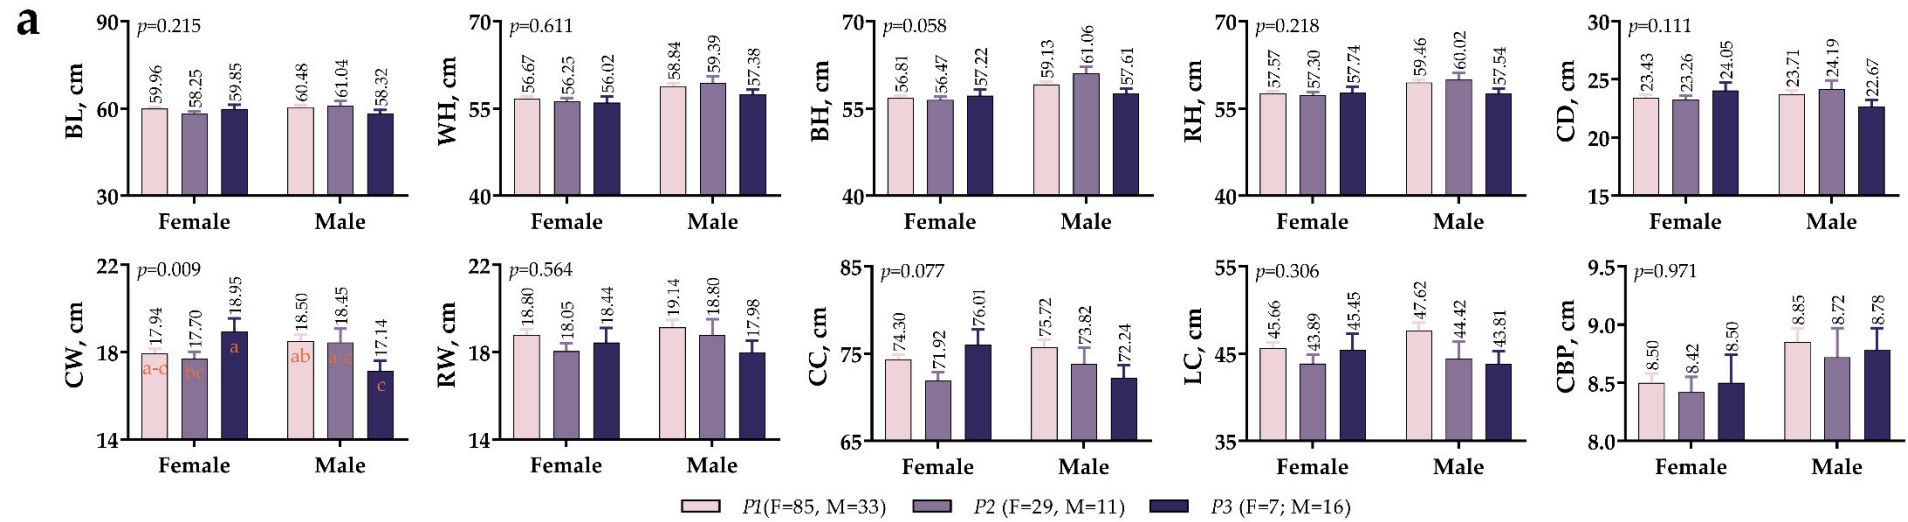

**Figure S1.** *IGF1* 5'UTR polymorphism in meat-type lambs: effect on body measurements. a: Body measurements on the 90th day. The values with different letters (a-c) in each graph are statistically different ( $p < 0.05$ ).

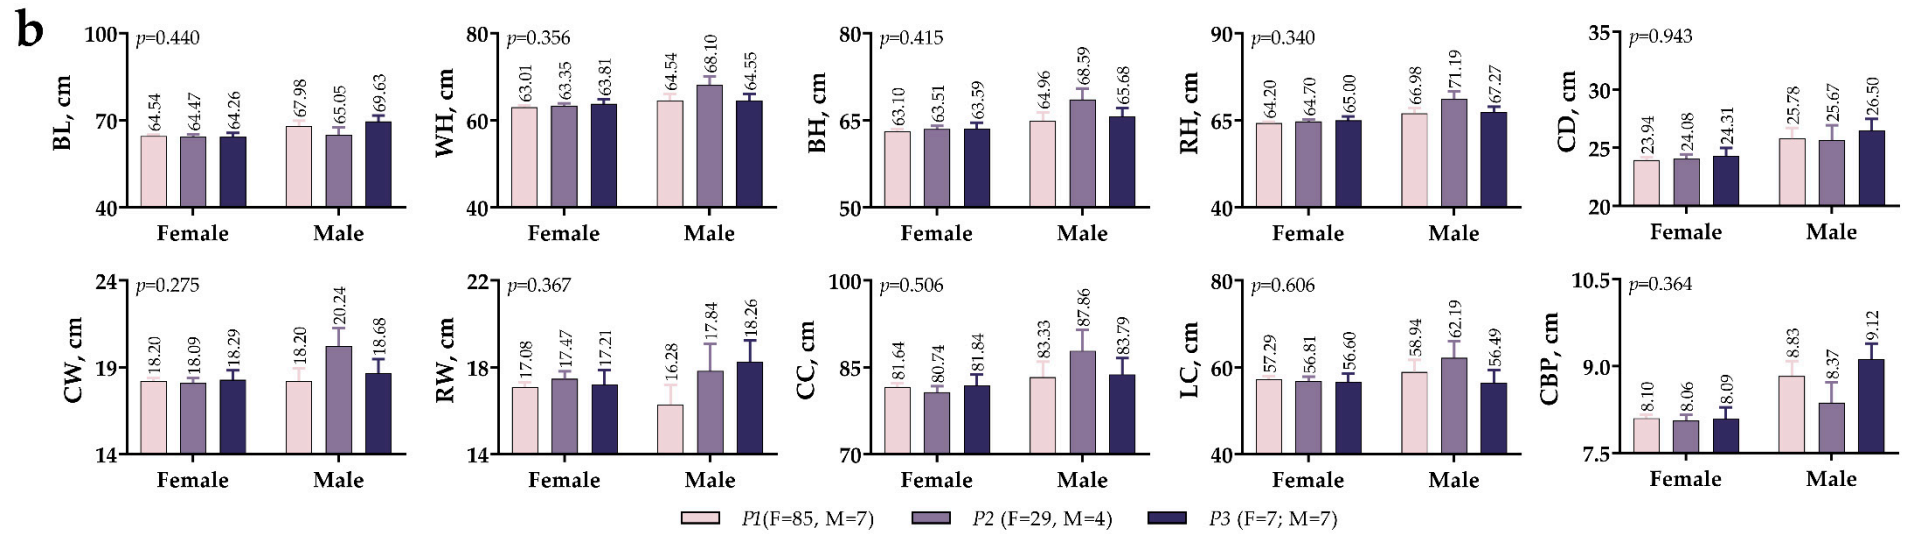

Figure S1 continued. *IGF1* 5'UTR polymorphism in meat-type lambs: effect on body measurements. b: Body measurements on the 180<sup>th</sup> day.

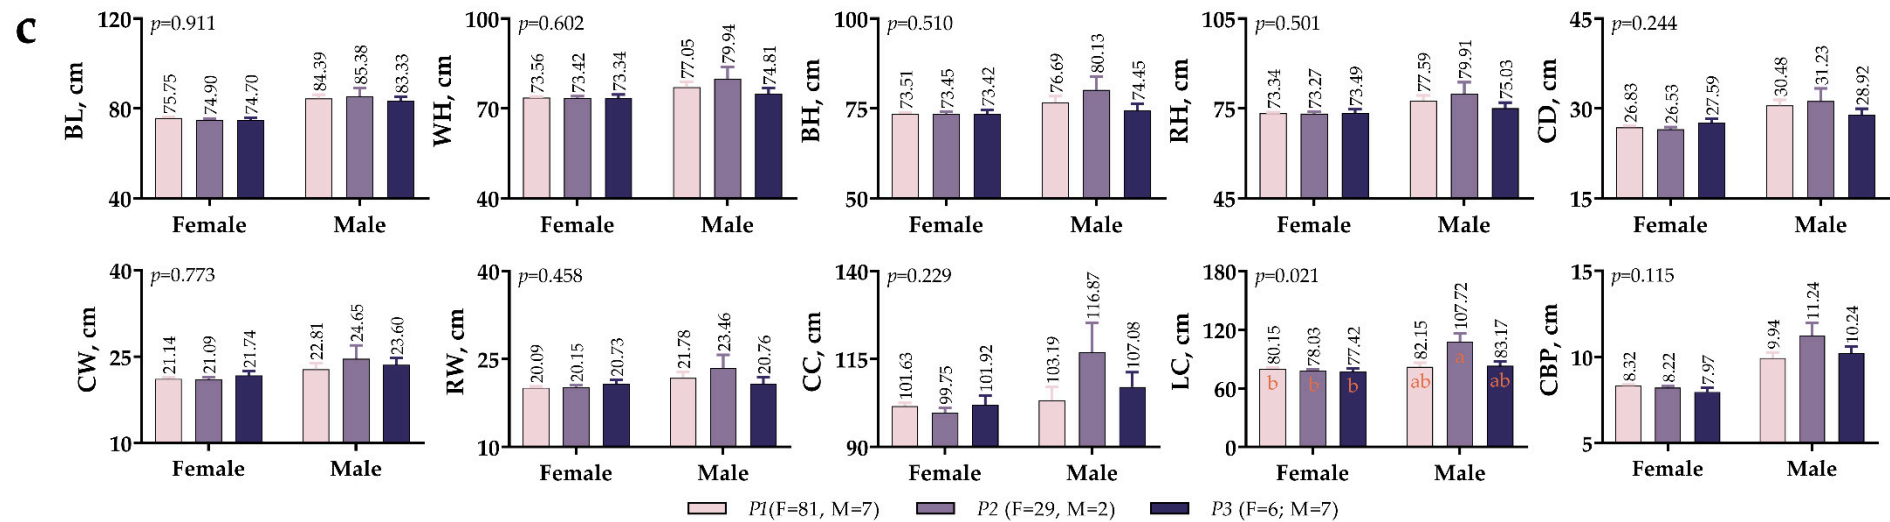

**Figure S1 continued.** *IGF1* 5'UTR polymorphism in meat-type lambs: effect on body measurements. c: Body measurements on the 360th day. The values with different letters (a-c) in each graph are statistically different ( $p < 0.05$ ).

## References

1. Cohen, J. Statistical power analysis for the behavioral sciences (2nd ed.); Hillsdale, NJ: Lawrence Erlbaum, 1988.
